# Supplementary material for: Drill-site selection for cosmogenic-nuclide exposure dating of the bed of the Greenland Ice Sheet
Source: Copernicus journal article supplement (doi:10.5194/tc-16-3933-2022), 2022-10-04
Supplement: Supplementary file 1 [file tc-16-3933-2022-supplement.zip]

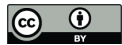

## *Supplement of*

# **Drill-site selection for cosmogenic-nuclide exposure dating of the bed of the Greenland Ice Sheet**

**Jason P. Briner et al.**

*Correspondence to:* Jason P. Briner ([jbriner@buffalo.edu](mailto:jbriner@buffalo.edu))

- tc-16-3933-2022-supplement-title-page.pdf
- Briner\_et\_al\_22\_supplement
  - frozen\_bed\_\_700m\_ice\_thick.cpg
  - frozen\_bed\_\_700m\_ice\_thick.dbf
  - frozen\_bed\_\_700m\_ice\_thick.prj
  - frozen\_bed\_\_700m\_ice\_thick.qmd
  - frozen\_bed\_\_700m\_ice\_thick.shp
  - frozen\_bed\_\_700m\_ice\_thick.shx
  - frozen\_bed\_\_700m\_ice\_thick\_crevasse\_free.cpg
  - frozen\_bed\_\_700m\_ice\_thick\_crevasse\_free.dbf
  - frozen\_bed\_\_700m\_ice\_thick\_crevasse\_free.prj
  - frozen\_bed\_\_700m\_ice\_thick\_crevasse\_free.qmd
  - frozen\_bed\_\_700m\_ice\_thick\_crevasse\_free.shp
  - frozen\_bed\_\_700m\_ice\_thick\_crevasse\_free.shx
  - frozen\_bed\_\_70mm\_ice\_thick\_crevasse\_free\_qtz.cpg
  - frozen\_bed\_\_70mm\_ice\_thick\_crevasse\_free\_qtz.dbf
  - frozen\_bed\_\_70mm\_ice\_thick\_crevasse\_free\_qtz.prj
  - frozen\_bed\_\_70mm\_ice\_thick\_crevasse\_free\_qtz.qmd
  - frozen\_bed\_\_70mm\_ice\_thick\_crevasse\_free\_qtz.shp
  - frozen\_bed\_\_70mm\_ice\_thick\_crevasse\_free\_qtz.shx
  - not\_qtz\_bearing.cpg
  - not\_qtz\_bearing.dbf
  - not\_qtz\_bearing.prj
  - not\_qtz\_bearing.qmd
  - not\_qtz\_bearing.shp

- not\_qtz\_bearing.shx
- qtz\_bearing.cpg
- qtz\_bearing.dbf
- qtz\_bearing.prj
- qtz\_bearing.shp
- qtz\_bearing.shx
- some\_qtz\_bearing.cpg
- some\_qtz\_bearing.dbf
- some\_qtz\_bearing.prj
- some\_qtz\_bearing.shp
- some\_qtz\_bearing.shx

The copyright of individual parts of the supplement might differ from the article licence.
